1 **Title:**

2 Connectivity networks and delineation of distinct coastal provinces along the Indian coastline  
3 using large-scale Lagrangian transport simulations

4

5 **Running Title:**

6 Larval connectivity along the Indian coastline

7

8 **Authors:**

9 D. K. Bharti<sup>1,2\*</sup> (ORCID ID: 0000-0002-5657-6952), Katell Guizien<sup>3</sup> (ORCID ID: 0000-0001-  
10 9884-7506), M. T. Aswathi-Das<sup>4,5</sup> (ORCID ID: 0000-0002-8857-2294), P. N.  
11 Vinayachandran<sup>4</sup> (ORCID ID: 0000-0002-4915-5455) and Kartik Shanker<sup>1</sup> (ORCID ID:  
12 0000-0003-4856-0093)

14 **Affiliations:**

15 <sup>1</sup> Centre for Ecological Sciences, Indian Institute of Science, Bengaluru, India

16 <sup>2</sup> CSIR-Centre for Cellular and Molecular Biology, Hyderabad, India

17 <sup>3</sup> CNRS, Sorbonne Université, Laboratoire d'Ecogéochimie des Environnements Benthiques  
18 (LECOB), Observatoire Océanologique de Banyuls, Banyuls-sur-Mer, France

19 <sup>4</sup>Centre for Atmospheric and Oceanic Sciences, Indian Institute of Science, Bengaluru, India

20 <sup>5</sup>National Centre for Polar and Ocean Research, Ministry of Earth Sciences, Goa, India

21

22 **\*Corresponding author:**

23 Address: Dr. D. K. Bharti, c/o Dr. Jahnvi Joshi, CSIR-Centre for Cellular and Molecular  
24 Biology, Uppal Road, Habsiguda, Hyderabad – 500 007, India

25 Email: [bharti.dharapuram@gmail.com](mailto:bharti.dharapuram@gmail.com)

26 **Abstract**

27

28 Ocean circulation defines the scale of population connectivity in marine ecosystems, and is  
29 essential for conservation planning. We performed Lagrangian transport simulations and built  
30 connectivity networks to understand the patterns of oceanographic connectivity along the  
31 Indian coastline. In these networks, nodes are coastal polygons and the edges connecting  
32 them represent the magnitude of larval transfer between them. We assessed the variation in  
33 connectivity networks within and between two monsoonal seasons, across El Niño–Southern  
34 Oscillation (ENSO) years and for pelagic larval durations (PLD) up to 50 days. We detected  
35 well-connected communities, mapped frequent connectivity breaks and ranked coastal areas  
36 by their functional role using network centrality measures. Network characteristics did not  
37 differ based on the ENSO year, but varied based on season and PLD. Large scale  
38 connectance (entire Indian coastline) was small, ranging from 0.5% to 3.4%, and the number  
39 of cohesive coastal communities decreased from 60 (PLD <4 days) to 30 (PLD >20 days)  
40 with increasing PLD. Despite intra-seasonal variation in connectivity breaks, four  
41 disconnected provinces were consistently identified across the entire PLD range, which  
42 partially overlapped with observed genetic and biogeographic breaks along the Indian  
43 coastline. Our results support the adoption of an adaptive regional management framework  
44 guided by fine-scale analysis of connectivity within the four provinces delineated in the  
45 present study. A few sites within each province displayed notably higher centrality values  
46 than other nodes of the network, but showed variation with season and PLD, and could be  
47 targeted for national and transnational conservation and management plans.

48

49 **Keywords:** biophysical model, dispersal, connectivity, Indian Ocean, marine biogeography

## 50 **Introduction**

51

52 Marine populations have traditionally been described as ‘open’, with high exchange of  
53 propagules between spatially distant populations owing to oceanic transport of pelagic life  
54 stages (Roughgarden et al., 1988). However, it is becoming apparent that local oceanographic  
55 features and species-specific traits determine where a population falls in the continuum from  
56 ‘open’ to ‘closed’ (Levin, 2006). Apart from influencing demographic processes at ecological  
57 time-scales (Gaines et al., 2007), long distance transport using ocean currents can also have  
58 consequences over evolutionary time-scales (Jablonski, 1986; Paulay & Meyer, 2006). This  
59 would shape patterns of population genetic connectivity across taxonomic groups and large-  
60 scale patterns of diversity and community structure.

61

62 An understanding of oceanographic processes is therefore important in the study of marine  
63 dispersal. However, field studies of pelagic larval transport are prohibitively difficult because  
64 of small larval size, challenges in taxonomic identification and navigating the vastness of the  
65 open ocean (Pineda et al., 2007). Biophysical modelling combines ocean circulation  
66 simulations with larval traits and habitat information to provide estimates of larval transport.  
67 The latter can be compared to empirical patterns of gene flow between populations to  
68 understand the demographic effects of larval transport on marine population connectivity  
69 (Liggins et al., 2013).

70

71 The accuracy of larval transport estimates depend upon the resolution of ocean circulation  
72 simulations (Briton et al. 2018), location of reproductive populations and the degree of  
73 species-specificity in larval release timing, pelagic larval duration (PLD) (Di Franco &

74 Guidetti, 2011), and larval behaviour (Guizien et al. 2006). Although larval behaviour can  
75 strongly alter dispersal patterns and distribution of suitable habitat can restrict connectivity,  
76 ocean flow and PLD are the minimum parameters required to assess seascape connectivity  
77 (North et al., 2009). Such general biophysical simulations of larval transport based on global  
78 ocean circulation simulations can serve as a foundation for regional ecological studies by  
79 delineating disruptions in connectivity (Rossi et al., 2014). Within well connected regions,  
80 the frequent exchange of individuals among spatially distinct populations can influence their  
81 demography, giving rise to a metapopulation (Hanski & Gaggiotti, 2004). Identifying the  
82 extent of well-connected populations, within which metapopulation functioning is expected  
83 to occur, is a pre-requisite for establishing the scale of biodiversity management (Halpern &  
84 Warner, 2003). Since management policies are a national prerogative, it is also important to  
85 include all the regions falling within the boundaries of an Exclusive Economic Zone (EEZ) in  
86 connectivity studies.

87

88 The EEZ of India includes (1) a coastline of over 5000 km that divides the northern Indian  
89 Ocean into two basins – the Arabian Sea in the west and the Bay of Bengal in the east, (2) the  
90 Lakshadweep archipelago located in the Arabian Sea, and (3) the Andaman and Nicobar  
91 archipelago located in the Bay of Bengal. Sri Lanka is an island located in the Bay of Bengal,  
92 which is separated from India by the narrow Palk Strait, where both countries have  
93 contiguous EEZs (Figure 1). There is an absence of large-scale connectivity studies from the  
94 northern Indian Ocean (see George et al., 2011 and Gaonkar et al., 2012 for local-scale  
95 studies) despite a large body of physical oceanography studies from this region (reviewed in  
96 Shetye & Gouveia, 1998; Schott & McCreary, 2001; Shankar et al., 2002; Schott et al., 2009;  
97 Vinayachandran, 2009; Hood et al., 2017).

98 The upper ocean circulation along the coasts of India is driven by seasonally reversing  
99 monsoon winds (Schott & McCreary, 2001). The large-scale monsoon currents flow eastward  
100 during summer (June to September, summer monsoon) and westward during winter  
101 (November to February, winter monsoon). Coastal currents, namely the East India Coastal  
102 Current (EICC) and the West India Coastal Current (WICC) (Shetye & Gouveia, 1998), link  
103 coastal circulation with the large-scale monsoon circulation. Saltier Arabian Sea water flows  
104 into the Bay of Bengal during the summer monsoon (Vinayachandran et al., 2018) and  
105 fresher Bay of Bengal water flows into the Arabian Sea during the winter monsoon.

106

107 During the summer (south-west) monsoon, the West India Coastal Current (WICC) flows  
108 towards the equator along the west coast of India (Shetye & Gouveia, 1998, Amol et al.,  
109 2014), which joins the South-West Monsoon Current (SMC). The latter turns around the  
110 southern tip of India and Sri Lanka and flows into the Bay of Bengal, connecting to the  
111 northward branch of the Sri Lanka Dome, which reverses direction at 10°N (Vinayachandran  
112 & Yamagata, 1998) (Figure 1). The East India Coastal Current (EICC) flows poleward during  
113 the summer monsoon (Mukherjee et al., 2014). During this period, coastal upwelling events  
114 of varying intensity occur along the west coast of India (Luis & Kawamura, 2004; Hood et  
115 al., 2017), with weak upwelling along the eastern coast of India, and the Andaman and  
116 Nicobar islands (Varkey et al. 1996; Vinayachandran et al., 2021).

117

118 During the winter (north-east) monsoon, the circulation along the east coast of India reverses  
119 direction to flow equatorward (EICC) (Shetye & Gouveia, 1998, Mukherjee et al., 2014),  
120 turns around Sri Lanka and the southern tip of India (Winter Monsoon Current) and flows  
121 poleward along the west coast (WICC) (Figure 1, Shetye & Gouveia, 1998; Shankar et al.

122 2002; Amol et al., 2014). Together with alongshore flow reversal during the winter monsoon,  
123 upwelling reverses into downwelling events within a 40 km wide band along the east coast of  
124 India (Varkey et al. 1996) and along the north-west coast of India (Luis & Kawamura, 2004).

125

126 The seasonal wind-driven circulation described above is modulated at several time-scales  
127 (Schott et al. 2009). The strong atmospheric-oceanographic coupling in the entire Indian  
128 Ocean makes its circulation sensitive to atmospheric intra-seasonal oscillations acting at  
129 time-scales ranging from a week (northward propagating precipitation anomalies) to 30-60  
130 days (Madden-Julian Oscillation, Madden & Julian 1972). Inter-annual variability in the  
131 Indian Ocean circulation arises not only from El Niño Southern Oscillation, which leads to a  
132 year-long basin-scale warming after El Niño events, but also from Indian Ocean Dipole  
133 events, with cool (warm) and dry (wet) anomalies in the eastern (western) Indian Ocean in  
134 some years (Vinayachandran et al. 2009).

135

136 In such a complex oceanographic context with large to meso-scale structures, various levels  
137 of flow connectivity are to be expected along the vast Indian coastline, and it is difficult to a  
138 priori anticipate how biological filters such as spawning timing and PLD alter them.  
139 Identifying spatial scales at which demographic connectivity and/or gene flow between  
140 populations ceases to exist to give rise to biogeographic boundaries, is essential to inform  
141 marine resources and biodiversity management (Mertens et al., 2018).

142

143 In the current study, we aim to describe patterns of oceanographic connectivity focusing on  
144 the Indian coastline. To do so, we carried out Lagrangian transport simulations of neutrally  
145 buoyant larvae released along the study region's coastline during the two major seasons –

146 summer and winter monsoon for three years and across a wide range of PLD. Transport  
147 simulations were post-processed to build coastal connectivity networks for different  
148 combinations of season, year and PLD. The specific aims of our study were to (1) identify  
149 breaks in oceanographic connectivity and analyze their stability across years, seasons and  
150 PLD, (2) identify the most central locations within the connectivity network of the larger  
151 Indian coastline, and (3) examine the implications of these connectivity networks for  
152 biodiversity management.

153

## 154 **Methods**

155

### 156 *Ocean circulation model*

157

158 The HYbrid Coordinate Ocean Model (HYCOM, Chassignet et al., 2007) is an ocean general  
159 circulation model, which uses a combination of vertical coordinate systems (isopycnal, z-  
160 coordinate and sigma levels) to effectively simulate ocean circulation in three dimensions.  
161 The output from this circulation model is available for the global ocean as gridded values of  
162 horizontal velocities (eastward and northward), sea surface elevation, salinity and  
163 temperature at  $1/12^\circ$  spatial resolution, 3-hour temporal frequency and for 40 z-levels in  
164 depth. The model is forced by wind stress and fluxes of heat and freshwater at the surface.  
165 This model, however, does not include tidal flows, which would contribute to small-scale  
166 coastal processes. Particle transport in the vertical, which is particularly important in coastal  
167 areas with upwelling or downwelling, was accounted for after reconstructing vertical velocity  
168 values. To do so, the continuity equation of mass conservation was applied to horizontal  
169 velocities, and sea surface elevation data for the upper 27 depth levels from surface, i.e. down

170 to 400 m deep. Beyond this depth, the coarse vertical resolution of HYCOM data can lead to  
171 anomalies in the derived vertical velocity values. Thus, the horizontal velocities obtained  
172 directly from HYCOM and the vertical velocity derived using the continuity equation was  
173 used to drive the particle tracking model from the free surface down to 400 m depth.

174

175 We used HYCOM output (GOFS3.0: HYCOM + NCODA Global 1/12° Reanalysis,  
176 GLBu0.08: expt\_19.1 – <https://www.hycom.org/dataserver/gofs-3pt0/reanalysis>) for the  
177 spatial extent ~30°N-10°S, 50°W-100°E and the 2008-2011 time period for particle tracking  
178 simulations spanning the winter (north-east) monsoon (November to February), and the  
179 summer (south-west) monsoon (June to September). These years were chosen based on  
180 availability of current data, and to capture the variation in ocean circulation presented by  
181 various states of the El Niño–Southern Oscillation (ENSO). While 2009-2010 represents an  
182 El Niño year, 2011 was a La Niña year ([https://psl.noaa.gov/enso/past\\_events.html](https://psl.noaa.gov/enso/past_events.html)).

183

184 *Particle tracking model*

185

186 Connectivity Modeling System (CMS) is an open-source, offline three-dimensionall  
187 Lagrangian particle tracking model written in Fortran, which is compatible with HYCOM  
188 output. It works by interpolating velocity values to a given particle position using a fourth  
189 order Range-Kutta stepping scheme and advects the particle over a user-defined time-step  
190 (Paris et al., 2013).

191

192 In this study, we ran three dimensional particle tracking simulations, where larvae were  
193 simulated as neutrally buoyant particles, which passively drifted with ocean currents.



194 Particles were released along the coastline of the Indian subcontinent (Indian coastline and  
195 parts of neighbouring Pakistan to the west and Bangladesh to the east), Sri Lanka,  
196 Lakshadweep islands and the Andaman and Nicobar islands. Particles were released every 5  
197 km at 1 m below the surface, yielding a total of 2136 release locations along the length of the  
198 study area's coastline. Particle release locations were created using the packages '*raster*'  
199 (Hijmans, 2020), '*rgeos*' (Bivand & Rundel, 2020), '*sp*' (Pebesma & Bivand, 2005; Bivand  
200 et al., 2013) in R version 3.6.1 (R Core Team, 2019), and further edited in QGIS 3.14.0-Pi  
201 (QGIS.org, 2021).

202

203 The release frequency was one particle every three hours from each location between  
204 November to February (winter monsoon), and June to September (summer monsoon),  
205 summing up to about six million particles tracked during each monsoonal season. Particle  
206 positions were calculated using a time-step of 20 minutes, their coordinates were recorded  
207 every three hours, and each particle was tracked for a duration of 50 days after release. The  
208 tracking duration for particle trajectories was determined based on maximum values of  
209 pelagic larval duration reported for marine invertebrate taxa found in this region  
210 (Supplementary Information 1). For the purpose of analysis, each season was divided into 12  
211 release bouts of ten days each to capture intra-seasonal variation in hydrodynamics that can  
212 influence particle trajectories.

213

214 *Connectivity networks*

215

216 Coastal polygons, each of area  $\sim 200 \text{ km}^2$ , including four release locations and numbering 528  
217 in total, were created along the coast of the study area (Supplementary Information 2) using

218 the packages '*raster*' (Hijmans, 2020), '*rgeos*' (Bivand & Rundel, 2020), '*sp*' (Pebesma &  
219 Bivand, 2005; Bivand et al., 2013) in R version 3.6.1 (R Core Team, 2019), and further  
220 edited in QGIS 3.14.0-Pi (QGIS.org, 2021). Connectivity matrices of larval flux were built by  
221 calculating the proportion of particles released in an origin coastal polygon that successfully  
222 dispersed to a destination coastal polygon for each PLD ranging from 2 to 50 days, with an  
223 interval of 2 days. Considering all polygons as potential origin and destination sites for  
224 larvae, the size of a larval flux matrix was  $528^2$  (i.e. 2,78,784 potential connections). Laval  
225 flux per unit surface was obtained by scaling larval flux values with the the area of the  
226 destination polygon (Figs 2a, 2b). Given the frequency distribution of PLD for marine  
227 invertebrates found in the Indian Ocean, connectivity matrices were averaged into four PLD  
228 classes for each spawning period – 2-4 days, 6-12 days, 14-20 days and 22-50 days  
229 (Supplementary Information 3).

230

231 In total, 288 connectivity matrices were built corresponding to the different PLD-classes,  
232 spawning periods, seasons and years (4 PLD-classes  $\times$  2 seasons  $\times$  12 spawning periods  $\times$  3  
233 years). Each connectivity matrix defined a connectivity network, where nodes were coastal  
234 polygons and directed weighted edges between each pair of nodes were values of larval flux  
235 per unit surface between them (Figs 2a, 2b). Various metrics were used to describe the  
236 connectivity network – connectance (proportion of non-zero edges), number of singleton  
237 nodes (nodes not connected to any other node within the network) and number of weak  
238 subgraphs (group of nodes connected through paths in a single direction) or strong subgraphs  
239 (group of nodes connected through paths in both directions) based on the nature of  
240 connectivity.

241

242 *Community detection*

243

244 Each of the 288 connectivity networks was individually processed to detect communities  
245 using the Infomap algorithm (Rosvall & Bergstrom, 2008) (Figs 2a, 2b) by applying the  
246 ‘*cluster\_infomap*’ function in the ‘*igraph*’ package (Csardi & Nepusz, 2006) in R. This  
247 algorithm uses information-theoretic principles to define a community based on the ease of  
248 flow between network nodes. A community is detected when a random walker visits a set of  
249 nodes within the network more often than nodes outside it and is likely to get trapped  
250 between them (Rosvall & Bergstrom, 2008). The significance of a detected community was  
251 estimated using its coherence ratio – the proportion of particles that originate from nodes  
252 within a community and remain within the same community (Rossi et al., 2014). A coherence  
253 ratio greater than 0.5 was applied to detect well connected communities, and the location of  
254 community boundaries (referred to as community breaks henceforth) was detected.  
255 Community breaks were classified based on their frequency of occurrence across spawning  
256 periods within a PLD-class. Those occurring with a frequency greater than 50% were termed  
257 ‘frequent’ and those with a frequency greater than 90% were termed ‘highly consistent’.

258

259 *Centrality measures*

260

261 For centrality measures using shortest path calculations, larval flux values were transformed  
262 into distance between nodes by applying a  $\log(1/x)$  transformation (Costa et al., 2017). The  
263 role and importance of each node (coastal polygon) in the connectivity network (PLD-class  $\times$   
264 season  $\times$  spawning period) was assessed using six different metrics. Node degree (number of  
265 non-zero edges from a node) and strength (sum of weight of edges from a node) were used to

266 rank nodes according to their overall influence on the network (Dubois et al., 2016).  
267 Betweenness centrality, which measures the number of shortest paths between node pairs that  
268 pass through a given node (Freeman, 1977), was used to identify nodes which control  
269 transport within the connectivity network. Clustering coefficient, the proportion of realized  
270 directed triangles (three nodes connected in all possible ways) between a focal node and its  
271 immediately connected nodes (Fagiolo, 2007), was used to measure the propensity of a node  
272 to cluster with its neighbours leading to redundancy within a network. Bridging centrality, a  
273 product of betweenness centrality and bridging coefficient (node ranking based on location  
274 between dense network sub-graphs) (Hwang, 2008), was used to identify nodes which control  
275 connections between network communities. Closeness centrality, the inverse of sum of  
276 pairwise shortest distances between a given node and all other nodes in a network, was used  
277 to identify nodes that can independently communicate with different regions within strong  
278 subgraphs in a network (Freeman, 1978).

279

280 Centrality measures were calculated using the tattoo toolbox (<https://github.com/costaandrea/>  
281 [TATTOO](#), Costa, 2017) in MATLAB R2019b.

282

283 *Statistical tests*

284

285 The significance of variation in the distribution of connectance and the number of singleton  
286 nodes, weak and strong subgraphs, and Infomap communities with >1 membership, with  
287 PLD-class, year and season was evaluated using non-parametric Kolmogorov-Smirnov test in  
288 R version 3.6.1 (R Core Team, 2019).

289

## 290 **Results**

291

292 There was no significant variation in most connectivity network characteristics between  
293 years, while their variation between spawning periods within a year was found to be large  
294 (Supplementary Information 4). Based on these results, variability of all metrics was  
295 estimated by pooling 36 connectivity matrices across years (3 years  $\times$  12 spawning periods)  
296 for each PLD-class and season.

297

### 298 *Network descriptors*

299

300 Connectance was low along the Indian coastline, irrespective of the PLD-class and season,  
301 with values ranging from 0.5% to 3.4%. During both the seasons, connectance showed the  
302 greatest significant difference between PLD less than 20 days and PLD greater than 20 days  
303 (Figure 3). Despite the low connectance, there were less than ~30% singleton nodes across  
304 PLD-classes and seasons, indicating that transport further than 5 km along the coast  
305 (minimum distance between release locations in adjacent coastal polygons) was common  
306 (Figure 3). The number of singleton nodes increased till a PLD of 20 days, indicating that  
307 local connections with neighbouring coastal polygons at shorter PLDs disappeared at  
308 intermediate PLDs as particles dispersed away from the coast. Except for the PLD-class 6-12  
309 days, the number of singleton nodes was not significantly different between seasons  
310 (Supplementary Material 3).

311

312 The number of weak subgraphs largely remained unchanged for PLD less than 20 days  
313 (ranging from 4 to 36), while the number of strong subgraphs significantly decreased between

314 the PLD less than 6 days (ranging from 20 to 67) and the PLD greater than 20 days (ranging  
315 from 9 to 27) (Supplementary Material 4). This indicates that there was an increase in the  
316 number of bi-directional connections within subgraphs with increasing PLD. This  
317 densification of subgraphs, for PLD up to 20 days, was more pronounced in the summer  
318 monsoon as compared to the winter monsoon (Supplementary Information 4).

319

320 Put together, a significant increase in the connectance for PLD greater than 20 days indicates  
321 that a longer transport duration enabled greater transport distance along the coast and islands,  
322 leading to a decrease in the number of isolated singleton nodes and an increase in subgraph  
323 size. A concomitant decrease in the number of weak and strong subgraphs for PLD greater  
324 than 20 days indicates the formation of more densely connected subgraphs.

325

326 *Infomap communities*

327

328 Similar to the trend observed with strong subgraphs, the number of Infomap communities  
329 (communities hereafter) decreased with an increase in PLD (Figure 4a). Except for the PLD-  
330 class 6-12 days, the number of communities detected for the same PLD-class was not  
331 significantly different between seasons (Supplementary Material 4). The coherence ratio of  
332 the detected communities was significantly different between seasons (Supplementary  
333 Material 4) and decreased with increasing PLD as seen from the increase in variance within a  
334 PLD-class (Figure 4b). The decrease in coherence ratio indicates a decrease in the flux of  
335 particles circulating within a community through losses outside it.

336

337 The location of community breaks varied with PLD, season and spawning period (indicated  
338 by the variation in the consistency of breaks within a PLD-class). However, a few locations  
339 frequently appeared as community breaks across spawning periods (>50% frequency), with  
340 some occurring consistently with a frequency greater than 90% (Figure 5). These community  
341 breaks were found along the north-west coast of mainland India (south of the Gulf of  
342 Khambhat 21°N, and Gulf of Kutch), Palk Strait (a narrow channel separating the Indian  
343 landmass from Sri Lanka) and north-east India, across both seasons (Figure 5). In the summer  
344 monsoon, a consistent community break appeared at the southern tip of India for all PLDs.  
345 Additional breaks also appeared along the west and east coast of India for PLD less than 20  
346 days, but were not consistent across season and PLD.

347

348 *Node descriptors*

349

350 As observed with connectance, node degree increased with PLD as a longer transport  
351 duration promoted variability in transport from the same release location (Figure 6).  
352 However, the increase in node degree was not uniform in the study region, and was observed  
353 to be higher in the east coast of India and the Lakshadweep islands during the winter  
354 monsoon, southern tip of India during the summer monsoon, and Sri Lanka and the Andaman  
355 and Nicobar islands during both the seasons (Figure 6). Another consequence of transport  
356 over longer durations was the loss of particles from the coastal zone as observed from a  
357 decrease in the node strength across a majority of nodes across seasons (Figure 6). Node  
358 strength decreased more gradually with increasing PLD, and nodes with high values were  
359 more evenly distributed in space in the winter monsoon as compared to the summer monsoon  
360 (Figure 6).

361

362 The number of nodes with high values of centrality measures reduced drastically for PLD  
363 greater than 6 days with spatial disparity based on the season. For the shortest PLD,  
364 betweenness centrality and bridging centrality were higher and more uniformly distributed  
365 along the west coast of India as compared the east coast, while the opposite pattern was  
366 observed for closeness centrality. For this PLD range, limited transport led to high clustering  
367 coefficient along large extents of the Indian coastline in both seasons (Figure 7).

368

369 High betweenness and bridging centrality values, depicting nodes controlling larval transfer  
370 within a network, were consistently observed in regions along the west coast, south-east coast  
371 and western Sri Lanka during the winter monsoon, while in the summer monsoon they  
372 occurred in Sri Lanka, north-west coast and the Andaman and Nicobar islands. Both the  
373 island groups showed high betweenness and bridging centrality, but did not show consistent  
374 patterns across PLD and season. Nodes with high clustering coefficient, indicating node  
375 redundancy within a network, were observed in central east and west coasts during the winter  
376 monsoon, and the north-west coast and the Bangladesh coastline during the summer  
377 monsoon. Nodes with high closeness centrality varied with season and PLD, but the Gujarat  
378 and Bangladesh coasts displayed consistently high closeness values, thus facilitating direct  
379 larval transfer within the network communities (Figure 7).

380

## 381 **Discussion**

382

383 This is one of the first broad-scale studies to use ocean flow data and particle tracking models  
384 to describe patterns of coastal connectivity along the coastline of the Indian subcontinent and



385 the adjacent island groups. We found that properties of connectivity networks exhibited intra-  
386 season and inter-season variability showing differences with pelagic larval duration (PLD),  
387 but were comparable across years. Though values of connectance were generally low within  
388 the coastal network, there was an increase in the size and bidirectionality of network  
389 subgraphs with increasing PLD, resulting in fewer and larger well connected coastal  
390 communities.

391

392 Despite seasonal differences in the location of community breaks, particularly for PLD less  
393 20 days, four disconnected provinces along the mainland coast were identified across PLD  
394 and seasons put together. From west to east along the coastline of the Indian subcontinent, the  
395 first province extended across the Gulf of Khambat and the coast of Gujarat (southern  
396 boundary at 21°N), the second province was found along the west coast of India (~21°N to  
397 8°N), the third province observed in the summer monsoon extended from the southern tip of  
398 India to the Palk strait (Gulf of Mannar, between Sri Lanka and mainland India) and the  
399 fourth province was observed along the east coast of India (~11°N up to 22°N). Within each  
400 of these provinces, a few sites displayed notably higher centrality values than others, but their  
401 importance varied based on season and PLD.

402

403 *Oceanographic drivers of connectivity*

404

405 A striking feature of the upper ocean circulation along the Indian coastline is the seasonal  
406 reversal of coastal currents, which are anti-clockwise in the summer monsoon and clockwise  
407 in the winter monsoon. Despite the latter, three of the four coastal provinces delineated in our  
408 study remained stable across seasons. Such stability is consistent with two persistent

409 hydrodynamic barriers – one north of 20-21°N in the Arabian Sea (Luis & Kawamura, 2004)  
410 and the other associated with a deviation in coastal circulation around Sri Lanka near the  
411 southern tip of the Indian coastline (Schott & McCreary, 2001).

412

413 However, some hydrodynamic barriers and connectivity network descriptors exhibited intra-  
414 seasonal variability due to an interaction of spawning timing within a reproductive season  
415 with intra-seasonal flow variability. This flow variability is largely driven by atmospheric  
416 intra-seasonal oscillations in the Indian Ocean, resulting in short-lived  
417 upwelling/downwelling events along the Indian coastline (Varkey et al., 1996; Luis &  
418 Kawamura, 2004; Durand et al., 2009). These oscillations span over a wide range of time-  
419 scales ranging from a week to 60 days (Madden & Julian, 1972; Fu et al., 2003), which likely  
420 explains why intra-seasonal variability was not averaged out across the PLD range of 2 to 50  
421 days considered in the present study.

422

423 Inter-annual atmospheric oscillations, such as the El Niño–Southern Oscillation and the  
424 Indian Ocean Dipole, are also known to alter Indian Ocean climatology and large scale  
425 circulation (reviewed in Schott et al. 2009). Interestingly, though the resolution of a Global  
426 Ocean Circulation Model such as HYCOM is more suitable to describe inter-annual variation  
427 as compared to short lived atmospheric events, we find that intra-seasonal variability was  
428 greater than inter-annual variability for all descriptors of network connectivity. These results  
429 advocate for fine-tuning connectivity studies in the future to include a better description of  
430 short-lived atmospheric processes and to down-scale flow modelling within each of the  
431 provinces delineated in the present study.

432

433 *Biotic filters of connectivity and biogeographic boundaries*

434

435 Biological traits related to spawning season and PLD determine the time-dependent ocean  
436 flow scenarios that larvae are exposed to and act as filters over the connectivity patterns that  
437 are eventually realized in a given region. By combining empirical information on spawning  
438 season and PLD range of the species of interest (Supplementary Information 1) with  
439 connectivity descriptors from the present study, it is possible to project taxa-specific  
440 predictions of connectivity breaks.

441

442 For instance, in the case of both anthozoans (PLD: <7 days, likely summer spawning) and  
443 holothurians (PLD = 12-28 days, likely summer spawning), important connectivity breaks  
444 would be predicted to occur around the southern tip of India, Palk Strait, south-west Sri  
445 Lanka and ~20-21°N on the west coast of India. For several crustaceans (PLD = 8-43 days,  
446 likely winter spawning) and gastropods (PLD = 12-46 days, likely winter spawning),  
447 connectivity breaks would be predicted to occur around the Gulf of Khambat, Palk Strait and  
448 north-east Indian coastline. Finally, for taxonomic groups such as bivalves and non-  
449 holothurian echinoderms, connectivity patterns are not generalizable across species because  
450 of a large variability in their spawning period (bivalves) or PLD (non-holothurian  
451 echinoderms).

452

453 The occurrence of genetic breaks in connectivity has only been tested in a few studies of  
454 marine invertebrates along the Indian coastline, such as in the Indian prawn (the crustacean  
455 *Penaeus indicus*, PLD: 12-25 days, spawning: October-April) (Sajeela et al., 2019), intertidal  
456 periwinkles (the gastropod *Littoraria* species, PLD: 21-70 days, spawning: throughout year;

457 *Echinolittorina* species, PLD: 21-28 days, spawning: March-June) (Bharti, 2019) and the  
458 Asian green mussel (the bivalve *Perna viridis*, PLD = 17.5 days, spawning period:  
459 contrasting between coasts) (Divya et al., 2020). Across these PLD and spawning period  
460 combinations, the connectivity break consistently predicted around southern India coincided  
461 with patterns of population genetic connectivity (Figure 8a). For *Penaeus indicus* and  
462 *Echinolittorina malaccana*, genetic breaks also coincided with the predicted connectivity  
463 break around 21°N on the west coast of India. However, in many of these studies, the  
464 populations are separated by large gaps in sampling, which makes it difficult to identify all  
465 the genetic breaks and, more importantly, to differentiate between the role of isolation by  
466 distance versus dispersal barriers in shaping the observed patterns (Audzijonyte &  
467 Vrijenhoek, 2010).

468

469 The consistent community breaks predicted by our larval transport models in the Palk Strait  
470 in both seasons and in the southern tip of India during the summer monsoon, correspond to  
471 the separation of southern India and Sri Lanka from the east and west coasts suggested by the  
472 Spalding et al's (2007) classification of ecoregions along the world's coastlines (Figure 8A).  
473 This scheme uses published studies from multiple taxonomic groups and oceanographic  
474 processes to define biogeographic boundaries, where ecoregions represent areas showing  
475 similarities in species composition, which may be driven by unique oceanographic and  
476 geomorphological features. The distinct biogeography of the east and west coasts of India is  
477 also suggested by Ecological Marine Units defined by environmental parameters (Sayre et al.,  
478 2017), and patterns of community composition in marine invertebrates along the Indian  
479 coastline (Sivadas & Ingole, 2016; Sarkar et al., 2017). (Figure 8a)

480

481 The connectivity break south of the Gulf of Khambat, separates the linear coast of western  
482 India from the Gujarat, and is seen across at least half of all spawning periods for both  
483 seasons and PLD less than 20 days. This corresponds to the classification of an ecological  
484 marine unit extending across the Gulf of Oman to the Oman coastline (Sayre et al., 2017).  
485 This region is characterized by seasonal variation in salinity, with the formation of the  
486 Arabian Sea High Salinity Water Mass (Kumar & Prasad, 1999) in the winter monsoon and  
487 upwelling during the south-west monsoon, which influences productivity and zooplankton  
488 biomass (Madhupratap et al., 1996; Madhupratap et al., 2001). This indicates that ocean flow  
489 along with environmental features might drive patterns of biogeography in the northern  
490 Arabian Sea.

491

492 However, it is important to highlight the limitations of large-scale transport simulations of  
493 neutrally buoyant particles using PLD and spawning season alone, which may lead to an  
494 incomplete understanding of taxa-specific connectivity breaks. Firstly, larval transport is  
495 influenced by species-specific variation in buoyancy and swimming behaviour, which can  
496 deviate from predictions for neutrally buoyant larvae (Guizien et al., 2006; Robins et al.,  
497 2013), resulting in different connectivity patterns (Le Corre et al. 2018; Blanco et al. 2019).  
498 Secondly, large-scale ocean flow simulations, with a spatial resolution of ~10 km, are  
499 inadequate to describe meso-scale variability of coastal circulation. Such fine-scale  
500 variability has been shown to shape the connectivity of coastal populations in fragmented and  
501 spatially complex habitats (Padrón et al. 2018; Frys et al., 2020). Thirdly, filters acting pre-  
502 and post-transport (*sensu* Pineda et al. 2007), which are not accounted for in the current  
503 study, are likely to explain additional breaks at the level of demographic or genetic  
504 connectivity. Finally, simulations of neutrally buoyant larval transport are not likely to

505 identify connectivity breaks driven by ocean fronts exhibiting sharp differences in  
506 temperature and salinity (Sayre et al., 2017) (Figure 8a). This explains why some of the  
507 observed biogeographic boundaries, such as those reported in the central east and west coasts  
508 for bivalves (Sarkar et al., 2017) and pelagic fishes (Pillai et al., 2007) (Figure 8a), were not  
509 predicted as community breaks in our simulations.

510

### 511 *Implications for biodiversity conservation and management*

512

513 The community breaks identified from our study mark the scale and extent of metapopulation  
514 connectivity along the Indian coastline, and can be used to guide the management of marine  
515 biodiversity. The broad connectivity provinces from our study include the coast of Gujarat,  
516 the linear extent of the west coast, southern India and the east coast of India. Currently, 24  
517 National Parks and Wildlife Sanctuaries have been identified as Marine Protected Areas  
518 (MPA) on the mainland coast of India (Figure 8b), which are located within each of the  
519 provinces, with the exception of the linear west coast. Some of these MPAs are located in  
520 areas with recurrent connectivity breaks such as the Gulf of Mannar, Palk Strait, Andaman  
521 and Nicobar islands and the Gulf of Kutch. In these regions with complex coastal bathymetry,  
522 where connectivity breaks were detected at small spatial distances, community detection can  
523 be better defined by increasing the spatial resolution of ocean flow and the distribution of  
524 release locations (Briton et al. 2018). Spatially and temporally refined transport studies are  
525 key in accounting for the effect of small-scale ocean features on flow connectivity at the  
526 resolution of coastal populations and local habitat distribution. This defines the relevant  
527 spatial scale for assessing vulnerability of coastal populations and designing protection  
528 measures (Guizien et al. 2012, 2014).

529

530 The use of centrality measures has been suggested to guide coordinated management at the  
531 network level in several studies (Andrello et al. 2013). We find that some areas acting as  
532 stepping stones of connectivity (indicated by high betweenness centrality), such as the Gulf  
533 of Kutch in the north-west, Gulf of Mannar in the south-east and Sunderbans in the north-east  
534 of India, are already under the MPA scheme (Figure 8b). Designation of additional areas for  
535 protection, especially along the west coast of India, can improve the existing MPA network.  
536 However, within each of the predicted connectivity provinces, the importance of centrality  
537 measures differs with season and PLD, indicating that temporally adaptive management  
538 measures specific to local biodiversity might be necessary.

539

540 To conclude, the present study highlights the importance of intra-season variability in driving  
541 patterns of connectivity and provides a coarse prediction of connectivity provinces that fulfill  
542 a gap in marine biogeography studies from this region. Our results can guide the spatial  
543 scales at which future biophysical models should be set up. Based on the frequency of  
544 community breaks, we advocate for refining transport studies based on flow modelling at the  
545 appropriate resolution along the Gujarat coastline, around the southern tip of India and Sri  
546 Lanka, over two large areas extending along the western and eastern coasts of the Indian  
547 subcontinent, and within each of the island groups. Our findings of seasonal and taxa-specific  
548 variation in areas exhibiting a large influence on connectivity patterns can inform regional  
549 biodiversity management along the Indian coastline.



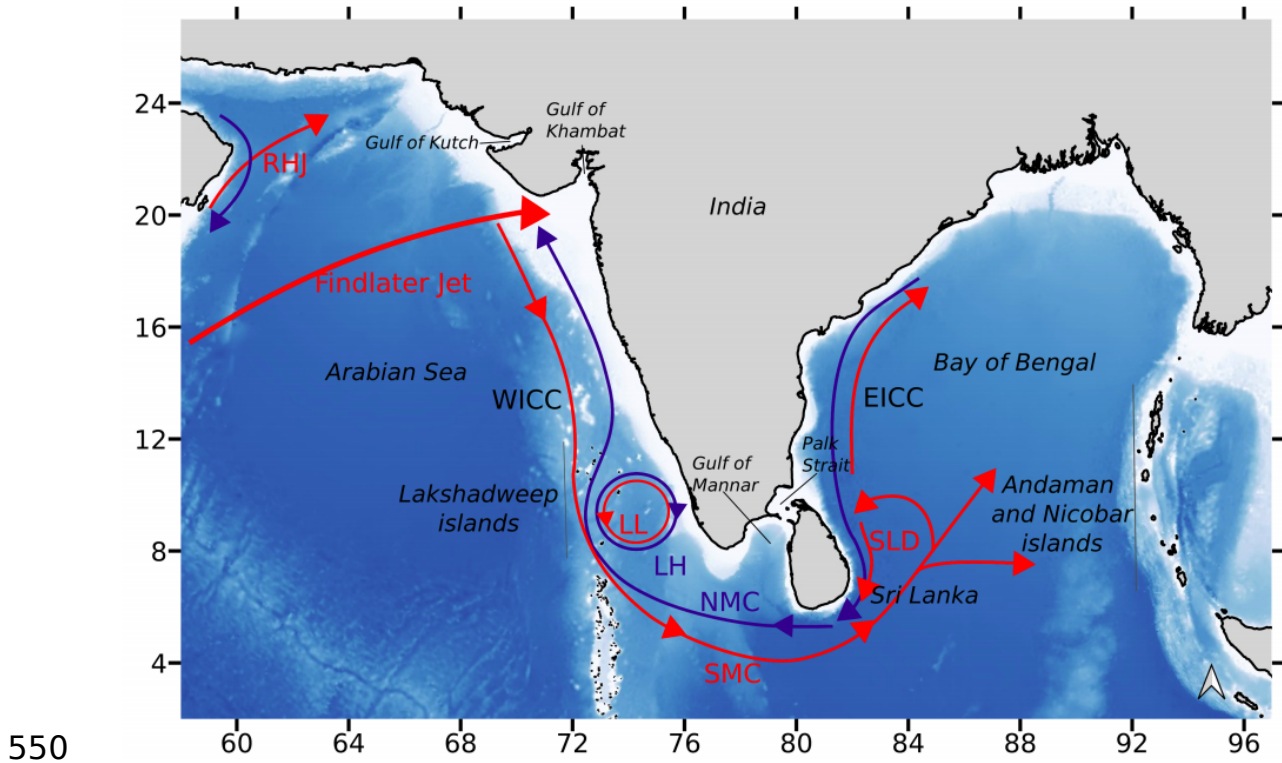

551 **Figure 1.** Schematic illustration of major currents along the Indian coastline – Ras al Hadd  
552 Jet (RHJ), West India Coastal Current (WICC), Lakshadweep Low (LL), Lakshadweep High  
553 (LH), South-West Monsoon Current (SMC), North-East Monsoon Current (NMC), SLD (Sri  
554 Lanka Dome) and East India Coastal Current (EICC). Findlater Jet is an atmospheric jet  
555 observed in the northern Arabian Sea during the summer monsoon. Processes associated with  
556 the summer monsoon are in red and those associated with the winter monsoon are in blue.  
557 WICC and EICC occur in both monsoons but differ in direction as indicated by the coloured  
558 arrows. Schematic adapted from Figure 1 in Luis & Kawamura (2004), Figure 1 in Peng et al.  
559 (2015) and Figure 1 in Vinayachandran et al. (2004).



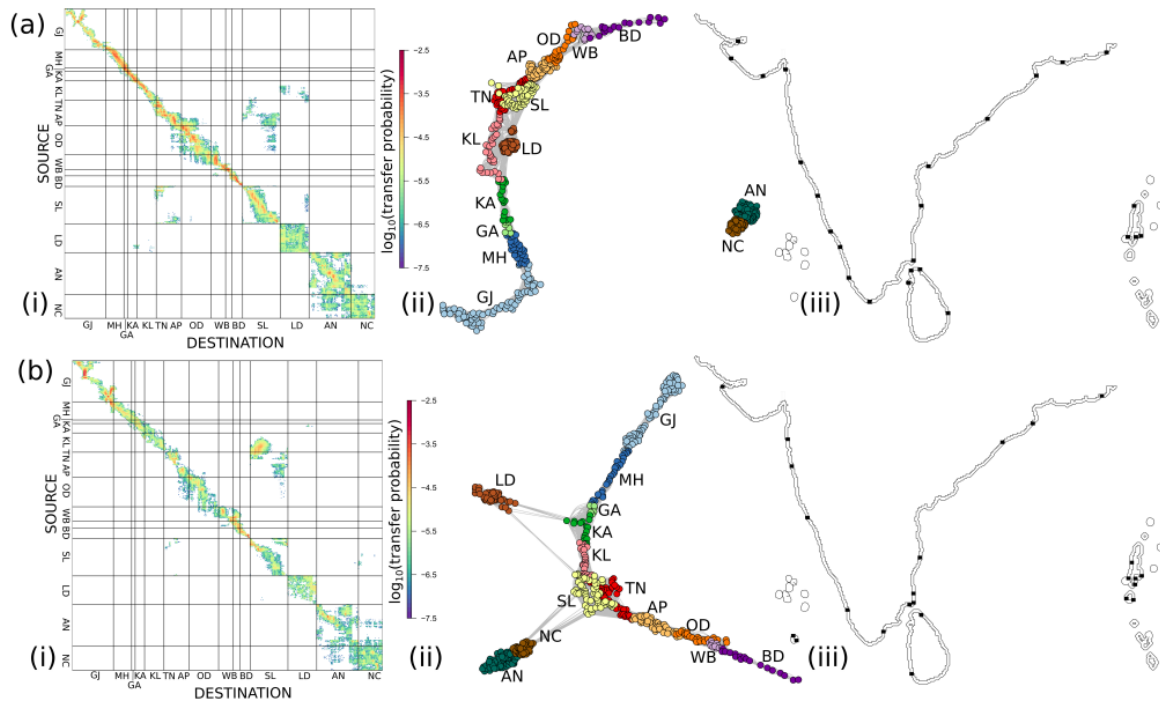

560

561 **Figure 2.** Schematic figure depicting the various stages in connectivity analysis. For  
 562 illustrative purposes, the figures shown here are derived from a mean connectivity matrix  
 563 across spawning periods and years for the PLD class 14-20 days, for (a) the winter monsoon  
 564 and (b) the summer monsoon. For each monsoon, subfigures are (i) connectivity matrix  
 565 represented as  $\log_{10}(\text{transfer probability})$ , (ii) connectivity network obtained from the raw  
 566 transfer probability matrix and (iii) network community boundaries (black squares along the  
 567 coastline) detected by applying the Infomap algorithm on the connectivity network. The  
 568 codes presented in (i) and (ii) correspond to GJ – Gujarat, Diu and a section of Pakistan coast,  
 569 MH – Daman and Maharashtra, GA – Goa, KA – Karnataka, KL – Kerala, TN – Tamil Nadu,  
 570 AP – Andhra Pradesh, OD – Odisha, WB – West Bengal, BD – section of Bangladesh coast,  
 571 SL – Sri Lanka, LD – Lakshadweep islands, AN – Andaman islands and NC – Nicobar  
 572 islands.

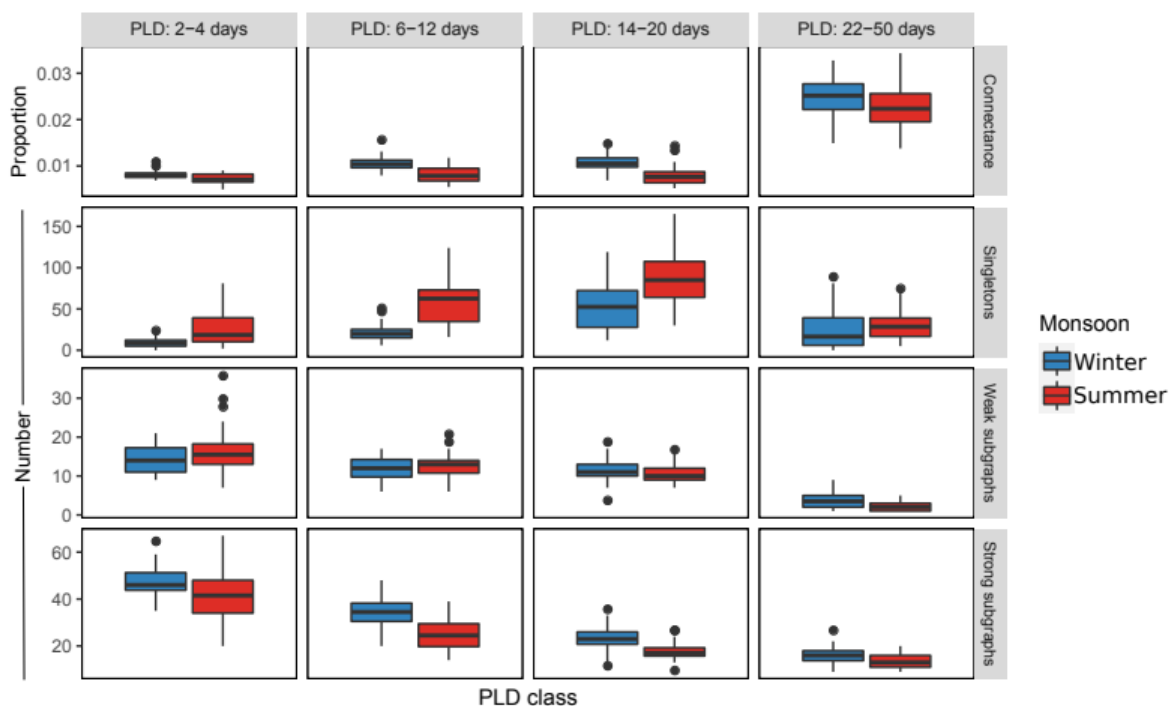

573

574 **Figure 3.** Summary characteristics of connectivity networks.

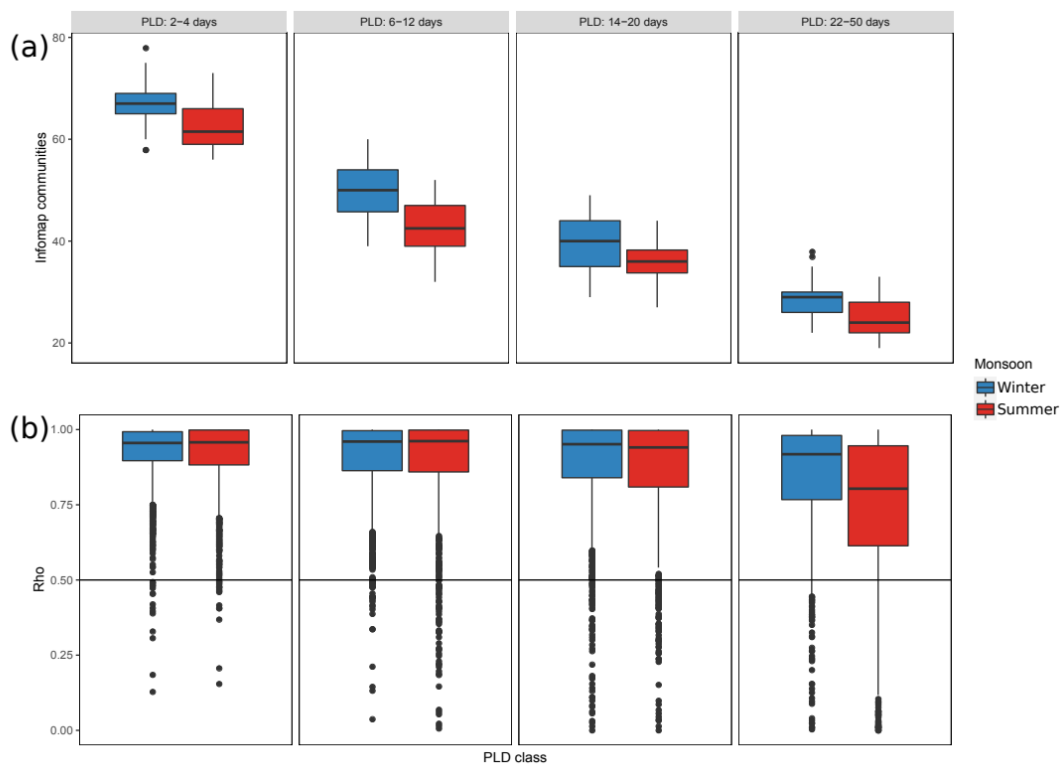

575

576 **Figure 4.** (a) Number of Infomap communities and (b) their coherence ratio.

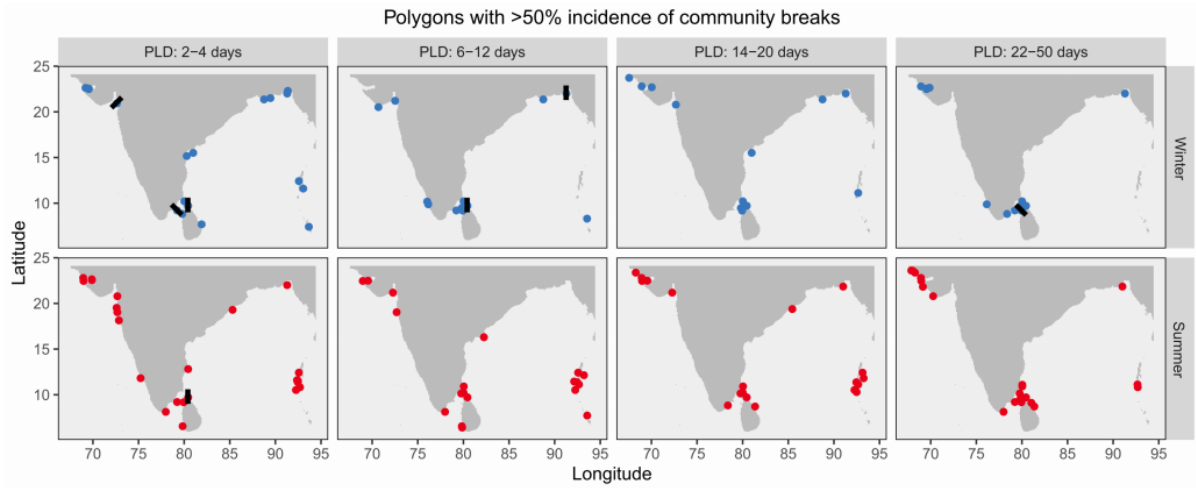

578 **Figure 5.** Distribution of Infomap community breaks. Blue and red circles indicate breaks  
579 with frequency >50% across spawning bouts for the winter and summer monsoon  
580 respectively. Black bars indicate breaks with frequency >90% across spawning bouts.

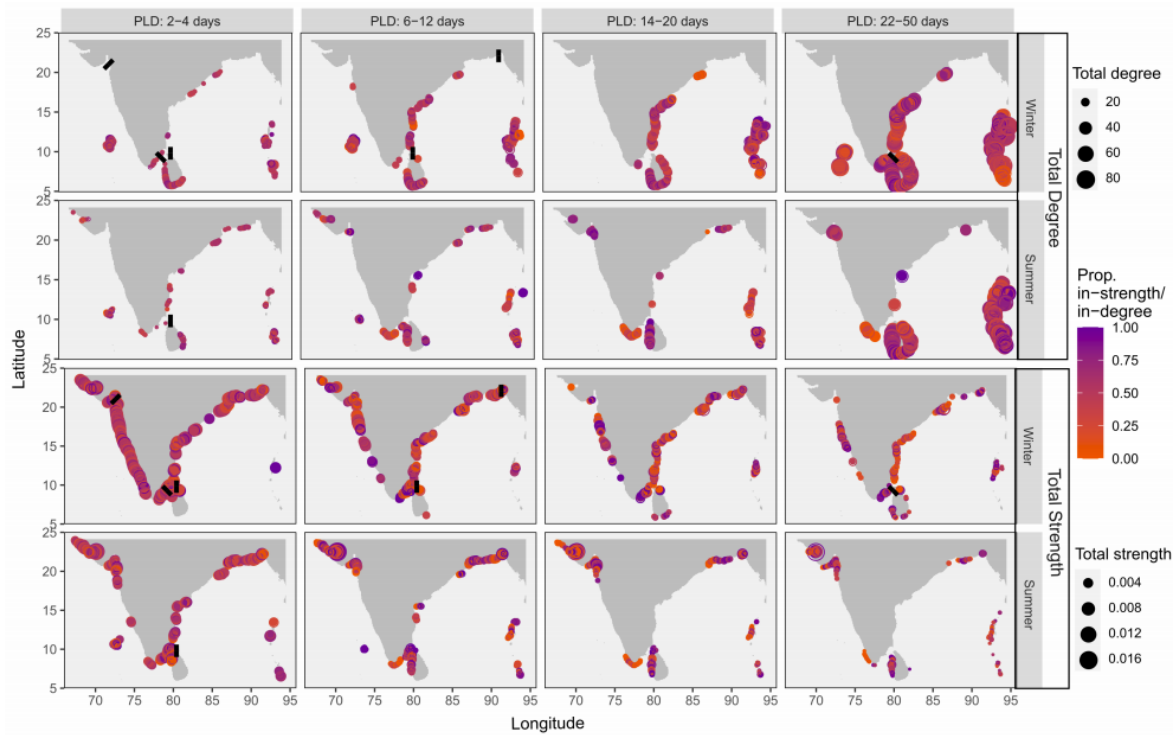

581

582 **Figure 6.** Spatial distribution of total strength (sum of incoming and outgoing edge weights)  
583 and degree (sum of number of incoming and outgoing edges) for nodes which have  
584 strength/degree values greater than the median at least 75% times across spawning bouts  
585 within a given PLD-class. The colour of a node indicates the magnitude of in-strength/degree,  
586 ranging from orange (source) to blue (sink). At each node, filled circles represent the median  
587 and the concentric open circles represent the 75<sup>th</sup> quantile of degree/strength. Infomap  
588 community breaks with >90% incidence are shown as black bars.

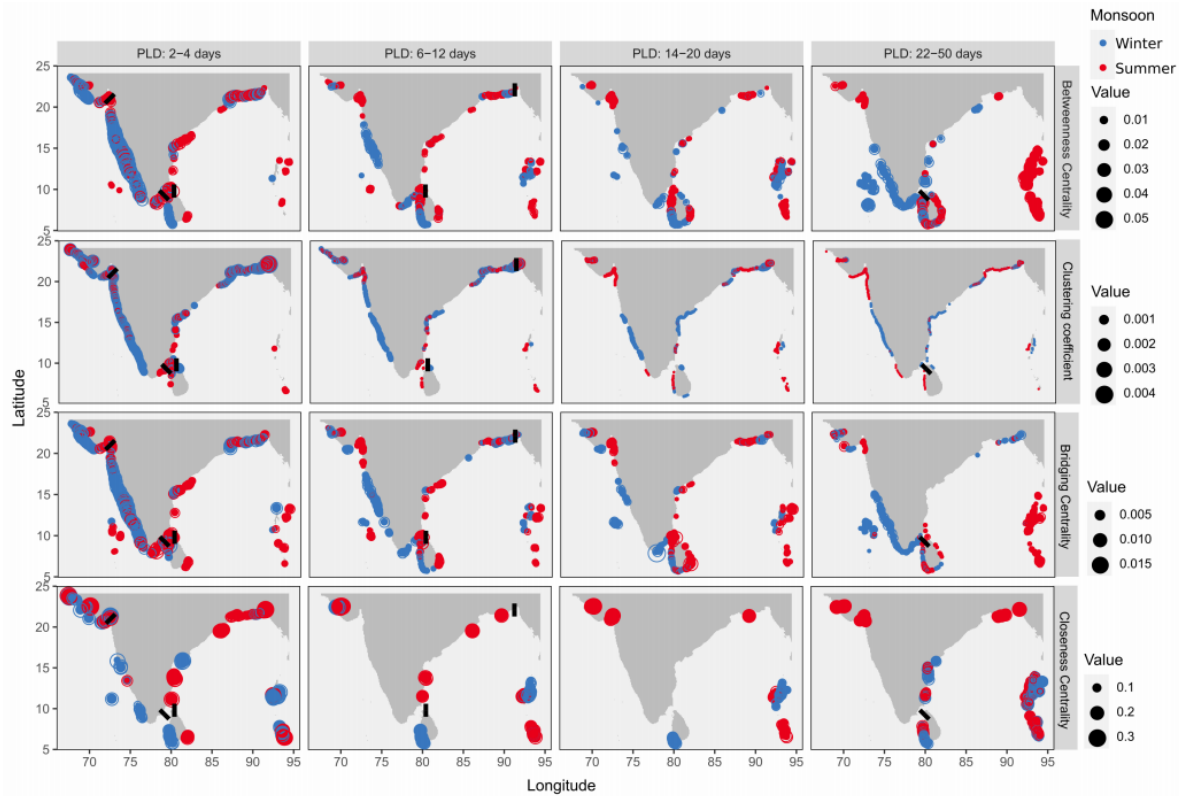

589

590 **Figure 7.** Spatial distribution of important nodes based on measures of network centrality.

591 The nodes displayed on the map have centrality values greater than the median at least 75%

592 times across spawning bouts within a given PLD-class. At each node, filled circles represent

593 the median and the concentric open circles represent the 75<sup>th</sup> quantile of the centrality

594 measure. Infomap community breaks with >90% incidence are shown as black bars.

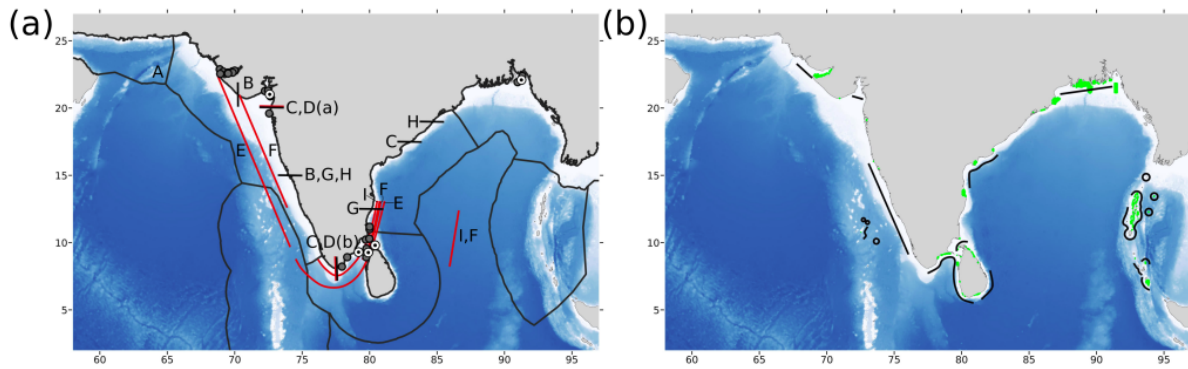

595

596

597 **Figure 8.** (a) Biogeographic boundaries (black lines) and genetic breaks (red lines) observed  
598 for marine species along the Indian coastline – A. Marine ecoregions along the Indian  
599 coastline (Spalding et al., 2007), B. Boundaries of Ecological Marine Units (Sayre et al.,  
600 2017), C. Subdivision of marine ecoregions based on distribution of gastropods, bivalves and  
601 polychaetes (Sivadas & Ingole, 2016), D. Genetic breaks observed for the intertidal snails (a)  
602 *Echinolittorina malaccana* and (b) *Littoraria strigata* (Bharti, 2019), E. Extent across which  
603 genetic breaks are observed for the marine fish *Rachycentron canadum* (Divya et al., 2017),  
604 F. Extent across which genetic breaks are observed for the shrimp species *Penaeus indicus*  
605 (Sajeela et al., 2019); G. Biogeographic divisions based on distribution of bivalve species  
606 (Sarkar et al., 2017); H. Boundaries of distribution zones defined for pelagic fisheries (Pillai  
607 et al., 2007) and I. Extent across which genetic breaks are observed for the mussel *Perna*  
608 *viridis* (Divya et al., 2020). Community breaks identified from this study are depicted using  
609 grey (>50% frequency across spawning periods) and concentric black (>90% frequency  
610 across spawning periods) circles. (b) Areas highlighted in green indicate marine protected  
611 areas (outlines exaggerated for visibility) and areas highlighted using black lines indicate  
612 regions observed to have high betweenness and bridging centrality from this study.

## 613 References

- 614 1. Amol, P., Shankar, D., Fernando, V., Mukherjee, A., Aparna, S. G., Fernandes, R.,  
615 Michael, G. S., Khalap, S. T., Satelkar, N. P., Agarvadekar, Y., Gaonkar, M. G., Tari,  
616 A. P., Kankonkar, A., & Vernekar, S. P. (2014). Observed intraseasonal and seasonal  
617 variability of the West India Coastal Current on the continental slope. *Journal of*  
618 *Earth System Science*, 123(5), 1045–1074. <https://doi.org/10.1007/s12040-014-0449-5>
- 619 2. Andrello, M., Mouillot, D., Beuvier, J., Albouy, C., Thuiller, W., & Manel, S. (2013).  
620 Low connectivity between Mediterranean marine protected areas: A biophysical  
621 modeling approach for the Dusky Grouper *Epinephelus marginatus*. *PLOS ONE*, 8(7),  
622 e68564. <https://doi.org/10.1371/journal.pone.0068564>
- 623 3. Audzijonyte, A., & Vrijenhoek, R. C. (2010). When gaps really are gaps: Statistical  
624 phylogeography of hydrothermal vent invertebrates. *Evolution; International Journal*  
625 *of Organic Evolution*, 64(8), 2369–2384. [https://doi.org/10.1111/j.1558-](https://doi.org/10.1111/j.1558-5646.2010.00987.x)  
626 [5646.2010.00987.x](https://doi.org/10.1111/j.1558-5646.2010.00987.x)
- 627 4. Bharti, D. K. (2019). *Dispersal patterns and processes in littorinid snails along the*  
628 *Indian coastline*. Indian Institute of Science, Bangalore.
- 629 5. Bivand, R., & Rundel, C. (2020). *rgeos: Interface to Geometry Engine—Open Source*  
630 *(‘GEOS’)*. <https://cran.r-project.org/package=rgeos>
- 631 6. Bivand, R. S., Pebesma, E., & Gómez-Rubio, V. (2013). *Applied spatial data analysis*  
632 *with R* (2nd ed.). Springer-Verlag. <https://doi.org/10.1007/978-1-4614-7618-4>
- 633 7. Blanco, M., Ospina-Álvarez, A., Navarrete, S. A., & Fernández, M. (2019). Influence  
634 of larval traits on dispersal and connectivity patterns of two exploited marine  
635 invertebrates in central Chile. *Marine Ecology Progress Series*, 612, 43–64.  
636 <https://doi.org/10.3354/meps12870>



- 637 8. Briton, F., Cortese, D., Duhaut, T., & Guizien, K. (2018). High-resolution modelling  
638 of ocean circulation can reveal retention spots important for biodiversity conservation.  
639 *Aquatic Conservation: Marine and Freshwater Ecosystems*, 28(4), 882–893.  
640 <https://doi.org/10.1002/aqc.2901>
- 641 9. Chassignet, E. P., Hurlburt, H. E., Smedstad, O. M., Halliwell, G. R., Hogan, P. J.,  
642 Wallcraft, A. J., Baraille, R., & Bleck, R. (2007). The HYCOM (HYbrid Coordinate  
643 Ocean Model) data assimilative system. *Journal of Marine Systems*, 65(1), 60–83.  
644 <https://doi.org/10.1016/j.jmarsys.2005.09.016>
- 645 10. Costa, A., Petrenko, A. A., Guizien, K., & Doglioli, A. M. (2017). On the calculation  
646 of betweenness centrality in marine connectivity studies using transfer probabilities.  
647 *PLoS ONE*, 12(12), 1–10. <https://doi.org/10.1371/journal.pone.0189021>
- 648 11. Csardi, G., & Nepusz, T. (2006). The igraph software package for complex network  
649 research. *InterJournal, Complex Systems*, 1695(5), 1–9.
- 650 12. Di Franco, A., & Guidetti, P. (2011). Patterns of variability in early-life traits of fishes  
651 depend on spatial scale of analysis. *Biology Letters*, 7(3), 454–456.  
652 <https://doi.org/10.1098/rsbl.2010.1149>
- 653 13. Divya, P. R., Linu, J., Mohitha, C., Kathirvelpandian, A., Manoj, P., Basheer, V. S., &  
654 Gopalakrishnan, A. (2017). Deciphering demographic history and fine-scale  
655 population structure of cobia, *Rachycentron canadum* (Pisces: Rachycentridae) using  
656 microsatellite and mitochondrial markers. *Marine Biodiversity*, 49(1), 381–393.  
657 <https://doi.org/10.1007/s12526-017-0817-x>
- 658 14. Divya, P. R., Jency, P. M. E., Joy, L., Kathirvelpandian, A., Singh, R. K., & Basheer,  
659 V. S. (2020). Population connectivity and genetic structure of Asian green mussel,

- 660 *Perna viridis* along Indian waters assessed using mitochondrial markers. *Molecular*  
661 *Biology Reports*, 47(7), 5061–5072. <https://doi.org/10.1007/s11033-020-05575-4>
- 662 15. Dubois, M., Rossi, V., Ser-Giacomi, E., Arnaud-Haond, S., López, C., & Hernández-  
663 García, E. (2016). Linking basin-scale connectivity, oceanography and population  
664 dynamics for the conservation and management of marine ecosystems. *Global*  
665 *Ecology and Biogeography*, 25(5), 503–515. <https://doi.org/10.1111/geb.12431>
- 666 16. Durand, F., Shankar, D., Birol, F., & Shenoi, S. S. C. (2009). Spatiotemporal structure  
667 of the East India Coastal Current from satellite altimetry. *Journal of Geophysical*  
668 *Research: Oceans*, 114(2), 1–18. <https://doi.org/10.1029/2008JC004807>
- 669 17. Fagiolo, G. (2007). Clustering in complex directed networks. *Physical Review E*,  
670 76(2), 026107. <https://doi.org/10.1103/PhysRevE.76.026107>
- 671 18. Freeman, L. C. (1977). A set of measures of centrality based on betweenness.  
672 *Sociometry*, 40(1), 35–41. <https://doi.org/10.2307/3033543>
- 673 19. Freeman, L. C. (1978). Centrality in social networks conceptual clarification. *Social*  
674 *Networks*, 1(3), 215–239. [https://doi.org/10.1016/0378-8733\(78\)90021-7](https://doi.org/10.1016/0378-8733(78)90021-7)
- 675 20. Frys, C., Saint-Amand, A., Le Hénaff, M., Figueiredo, J., Kuba, A., Walker, B.,  
676 Lambrechts, J., Vallaeys, V., Vincent, D., & Hanert, E. (2020). Fine-scale coral  
677 connectivity pathways in the Florida Reef Tract: Implications for conservation and  
678 restoration. *Frontiers in Marine Science*, 7. <https://doi.org/10.3389/fmars.2020.00312>
- 679 21. Fu, X., Wang, B., Li, T., & McCreary, J. P. (2003). Coupling between northward-  
680 propagating, intraseasonal oscillations and Sea Surface Temperature in the Indian  
681 Ocean. *Journal of the Atmospheric Sciences*, 60(15), 1733–1753.  
682 [https://doi.org/10.1175/1520-0469\(2003\)060<1733:CBNIOA>2.0.CO;2](https://doi.org/10.1175/1520-0469(2003)060<1733:CBNIOA>2.0.CO;2)

- 683 22. Gaines, S. D., Gaylord, B., Gerber, L., Hastings, A., & Kinlan, B. P. (2007).  
684 Connecting places: The ecological consequences of dispersal in the sea.  
685 *Oceanography*, 20(SPL.ISS. 3), 90–99. <https://doi.org/10.5670/oceanog.2007.32>
- 686 23. Gaonkar, C. A., S.V., S., George, G., V.M., A., Vethamony, P., & Anil, A. C. (2012).  
687 Numerical simulations of barnacle larval dispersion coupled with field observations  
688 on larval abundance, settlement and recruitment in a tropical monsoon influenced  
689 coastal marine environment. *Journal of Marine Systems*, 94, 218–231. [https://doi.org/](https://doi.org/10.1016/j.jmarsys.2011.12.002)  
690 [10.1016/j.jmarsys.2011.12.002](https://doi.org/10.1016/j.jmarsys.2011.12.002)
- 691 24. George, G., Vethamony, P., Sudheesh, K., & Babu, M. T. (2011). Fish larval transport  
692 in a macro-tidal regime: Gulf of Kachchh, west coast of India. *Fisheries Research*,  
693 110(1), 160–169. <https://doi.org/10.1016/j.fishres.2011.04.002>
- 694 25. Guizien, K., Belharet, M., Marsaleix, P., & Guarini, J. M. (2012). Using larval  
695 dispersal simulations for marine protected area design: Application to the Gulf of  
696 Lions (northwest Mediterranean). *Limnology and Oceanography*, 57(4), 1099–1112.  
697 <https://doi.org/10.4319/lo.2012.57.4.1099>
- 698 26. Guizien, K., Belharet, M., Moritz, C., & Guarini, J. M. (2014). Vulnerability of  
699 marine benthic metapopulations: Implications of spatially structured connectivity for  
700 conservation practice in the Gulf of Lions (NW Mediterranean Sea). *Diversity and*  
701 *Distributions*, 20(12), 1392–1402. <https://doi.org/10.1111/ddi.12254>
- 702 27. Guizien, K., Brochier, T., Duchêne, J.-C., Koh, B.-S., & Marsaleix, P. (2006).  
703 Dispersal of *Owenia fusiformis* larvae by wind-driven currents: Turbulence,  
704 swimming behaviour and mortality in a three-dimensional stochastic model. *Marine*  
705 *Ecology Progress Series*, 311, 47–66. <https://doi.org/10.3354/meps311047>

- 706 28. Halpern, B. S., & Warner, R. R. (2003). Matching marine reserve design to reserve  
707 objectives. *Proceedings. Biological Sciences*, 270(1527), 1871–1878.  
708 <https://doi.org/10.1098/rspb.2003.2405>
- 709 29. Hanski, I., & Gaggiotti, O. (2004). Metapopulation biology: Past, present, and future.  
710 In I. Hanski & O. E. Gaggiotti (Eds.), *Ecology, Genetics and Evolution of*  
711 *Metapopulations* (pp. 3–22). Academic Press. [https://doi.org/10.1016/B978-](https://doi.org/10.1016/B978-012323448-3/50003-9)  
712 [012323448-3/50003-9](https://doi.org/10.1016/B978-012323448-3/50003-9)
- 713 30. Hijmans, R. J. (2017). *raster: Geographic data analysis and modeling*. [https://cran.r-](https://cran.r-project.org/package=raster)  
714 [project.org/package=raster](https://cran.r-project.org/package=raster)
- 715 31. Hood, R. R., Beckley, L. E., & Wiggert, J. D. (2017). Biogeochemical and ecological  
716 impacts of boundary currents in the Indian Ocean. *Progress in Oceanography*, 156,  
717 290–325. <https://doi.org/10.1016/j.pocean.2017.04.011>
- 718 32. Hwang, W., Kim, T., Ramanathan, M., & Zhang, A. (2008). Bridging centrality:  
719 Graph mining from element level to group level. *Proceedings of the 14th ACM*  
720 *SIGKDD International Conference on Knowledge Discovery and Data Mining*, 336–  
721 344. <https://doi.org/10.1145/1401890.1401934>
- 722 33. Jablonski, D. (1986). Larval ecology and macroevolution in marine invertebrates.  
723 *Bulletin of Marine Science*, 39(2), 565–587.
- 724 34. Kumar, S. P., & Prasad, T. G. (1999). Formation and spreading of Arabian Sea high-  
725 salinity water mass. *Journal of Geophysical Research*, 104(C1), 1455–1464.  
726 <https://doi.org/10.1029/1998jc900022>
- 727 35. Le Corre, N., Pepin, P., Han, G., Ma, Z., & Snelgrove, P. V. R. (2019). Assessing  
728 connectivity patterns among management units of the Newfoundland and Labrador

- 729 shrimp population. *Fisheries Oceanography*, 28(2), 183–202. [https://doi.org/10.1111/](https://doi.org/10.1111/fog.12401)
- 730 [fog.12401](https://doi.org/10.1111/fog.12401)
- 731 36. Levin, L. A. (2006). Recent progress in understanding larval dispersal: New
- 732 directions and digressions. *Integrative and Comparative Biology*, 46(3), 282–297.
- 733 <https://doi.org/10.1093/icb/icj024>
- 734 37. Liggins, L., Treml, E. A., & Riginos, C. (2013). Taking the plunge: An introduction to
- 735 undertaking seascape genetic studies and using biophysical models. *Geography*
- 736 *Compass*, 7(3), 173–196. <https://doi.org/10.1111/gec3.12031>
- 737 38. Luis, A. J., & Kawamura, H. (2004). Air-sea interaction, coastal circulation and
- 738 primary production in the eastern Arabian Sea: A review. *Journal of Oceanography*,
- 739 60(3), 205–218. <https://doi.org/10.1023/B:JOCE.0000038327.33559.34>
- 740 39. Madden, R. A., & Julian, P. R. (1972). Description of global-scale circulation cells in
- 741 the tropics with a 40–50 day period. *Journal of Atmospheric Sciences*, 29(6), 1109–
- 742 1123. [https://doi.org/10.1175/1520-0469\(1972\)029<1109:DOGSCC>2.0.CO;2](https://doi.org/10.1175/1520-0469(1972)029<1109:DOGSCC>2.0.CO;2)
- 743 40. Madhupratap, M., Prasanna Kumar, S., Bhattathiri, P. M. A., Dileep Kumar, M.,
- 744 Raghukumar, S., Nair, K. K. C., & Ramaiah, N. (1996). Mechanism of the biological
- 745 response to winter cooling in the northeastern Arabian Sea. *Nature*, 384(6609), 549–
- 746 552. <https://doi.org/10.1038/384549a0>
- 747 41. Madhupratap, M., Gopalakrishnan, T. C., Haridas, P., & Nair, K. K. C. (2001).
- 748 Mesozooplankton biomass, composition and distribution in the Arabian Sea during
- 749 the Fall Intermonsoon: Implications of oxygen gradients. *Deep-Sea Research Part II: Topical Studies in Oceanography*, 48(6–7), 1345–1368.
- 750 [https://doi.org/10.1016/S0967-0645\(00\)00142-9](https://doi.org/10.1016/S0967-0645(00)00142-9)
- 751

- 752 42. Mertens, L. E. A., Treml, E. A., & von der Heyden, S. (2018). Genetic and  
753 biophysical models help define marine conservation focus areas. *Frontiers in Marine*  
754 *Science*, 5. <https://doi.org/10.3389/fmars.2018.00268>
- 755 43. Mukherjee, A., Shankar, D., Fernando, V., Amol, P., Aparna, S. G., Fernandes, R.,  
756 Michael, G. S., Khalap, S. T., Satelkar, N. P., Agarvadekar, Y., Gaonkar, M. G., Tari,  
757 A. P., Kankonkar, A., & Vernekar, S. (2014). Observed seasonal and intraseasonal  
758 variability of the East India Coastal Current on the continental slope. *Journal of Earth*  
759 *System Science*, 123(6), 1197–1232. <https://doi.org/10.1007/s12040-014-0471-7>
- 760 44. North, E., Gallego, A., & Petitgas, P. (2009). Manual of recommended practices for  
761 modelling physical – biological interactions during fish early life. *ICES*  
762 *COOPERATIVE RESEARCH REPORT*, 295.  
763 [http://www.crrc.unh.edu/mwg/b\\_physical\\_transport/manualrecommmedpractices.](http://www.crrc.unh.edu/mwg/b_physical_transport/manualrecommmedpractices.pdf)  
764 [pdf](http://www.crrc.unh.edu/mwg/b_physical_transport/manualrecommmedpractices.pdf)
- 765 45. Padrón, M., Costantini, F., Baksay, S., Bramanti, L., & Guizien, K. (2018). Passive  
766 larval transport explains recent gene flow in a Mediterranean gorgonian. *Coral Reefs*,  
767 37(2), 495–506. <https://doi.org/10.1007/s00338-018-1674-1>
- 768 46. Paris, C. B., Helgers, J., van Sebille, E., & Srinivasan, A. (2013). Connectivity  
769 Modeling System: A probabilistic modeling tool for the multi-scale tracking of biotic  
770 and abiotic variability in the ocean. *Environmental Modelling and Software*, 42, 47–  
771 54. <https://doi.org/10.1016/j.envsoft.2012.12.006>
- 772 47. Paulay, G., & Meyer, C. (2006). Dispersal and divergence across the greatest ocean  
773 region: Do larvae matter? *Integrative and Comparative Biology*, 46(3), 269–281.  
774 <https://doi.org/10.1093/icb/icj027>

- 775 48. Pebesma, E., & Bivand, R. (2005). *sp: Classes and methods for spatial data in R*.  
776 <https://cran.r-project.org/web/packages/sp/>
- 777 49. Peng, S., Qian, Y.-K., Lumpkin, R., Du, Y., Wang, D., & Li, P. (2015).  
778 Characteristics of the near-surface currents in the Indian Ocean as deduced from  
779 satellite-tracked surface drifters. Part I: Pseudo-Eulerian statistics. *Journal of Physical*  
780 *Oceanography*, 45(2), 441–458. <https://doi.org/10.1175/JPO-D-14-0050.1>
- 781 50. Pillai, N. G. K., Jayaprakash, A. A., & Ganga, U. (2007). Status and scope of research  
782 on pelagic fisheries of India. In M. J. Modayil & N. G. K. Pillai (Eds.), *Status and*  
783 *perspectives in marine fisheries research in India. CMFRI Diamond Jubilee*  
784 *Publication* (pp. 52–114). Central Marine Fisheries Research Institute.
- 785 51. Pineda, J., Hare, J. A., & Sponaugle, S. (2007). Larval transport and dispersal in the  
786 coastal ocean and consequences for population connectivity. *Oceanography*, 20(3),  
787 22–39. <https://doi.org/10.5670/oceanog.2007.27>
- 788 52. QGIS.org, 2021. QGIS Geographic Information System. QGIS Association.  
789 <http://www.qgis.org>
- 790 53. R Core Team. (2019). R: A language and environment for statistical computing. *R*  
791 *Foundation for Statistical Computing, Vienna, Austria*. <https://www.r-project.org/>
- 792 54. Robins, P. E., Neill, S. P., Giménez, L., Jenkins, S. R., & Malham, S. K. (2013).  
793 Physical and biological controls on larval dispersal and connectivity in a highly  
794 energetic shelf sea. *Limnology and Oceanography*, 58(2), 505–524.  
795 <https://doi.org/10.4319/lo.2013.58.2.0505>
- 796 55. Rossi, V., Ser-Giacomi, E., López, C., & Hernández-García, E. (2014).  
797 Hydrodynamic provinces and oceanic connectivity from a transport network help



- 798 designing marine reserves. *Geophysical Research Letters*, 41(8), 2883–2891.
- 799 <https://doi.org/10.1002/2014GL059540>
- 800 56. Rosvall, M., & Bergstrom, C. T. (2008). Maps of random walks on complex networks  
801 reveal community structure. *Proceedings of the National Academy of Sciences of the*  
802 *United States of America*, 105(4), 1118–1123.
- 803 <https://doi.org/10.1073/pnas.0706851105>
- 804 57. Roughgarden, J., Gaines, S., & Possingham, H. (1988). Recruitment dynamics in  
805 complex life cycles. *Science*, 241(4872), 1460–1466.
- 806 <https://doi.org/10.1126/science.11538249>
- 807 58. Sajeela, K. A., Gopalakrishnan, A., Basheer, V. S., Mandal, A., Bineesh, K. K.,  
808 Grinson, G., & Gopakumar, S. D. (2019). New insights from nuclear and  
809 mitochondrial markers on the genetic diversity and structure of the Indian white  
810 shrimp *Fenneropenaeus indicus* among the marginal seas in the Indian Ocean.  
811 *Molecular Phylogenetics and Evolution*, 136, 53–64.
- 812 <https://doi.org/10.1016/j.ympev.2019.04.007>
- 813 59. Sarkar, D., Bhattacharjee, M., & Chattopadhyay, D. (2017). Influence of regional  
814 environment in guiding the spatial distribution of marine bivalves along the Indian  
815 coast. *Journal of the Marine Biological Association of the United Kingdom*, 99(1),  
816 163–177. <https://doi.org/10.1017/S0025315417001837>
- 817 60. Sayre, R., Breyer, S., Butler, K., Van Graafeiland, K., Costello, M., Harris, P.,  
818 Goodin, K., Guinotte, J., Basher, Z., Kavanaugh, M., Halpin, P., Monaco, M., Cressie,  
819 N., Aniello, P., Frye, C., & Stephens, D. (2017). A three-dimensional mapping of the  
820 ocean based on environmental data. *Oceanography*, 30(1), 90–103.
- 821 <https://doi.org/10.5670/oceanog.2017.116>



- 822 61. Schott, F. A., & McCreary, J. P. (2001). The monsoon circulation of the Indian  
823 Ocean. *Progress in Oceanography*, 51(1), 1–123. [https://doi.org/10.1016/S0079-](https://doi.org/10.1016/S0079-6611(01)00083-0)  
824 [6611\(01\)00083-0](https://doi.org/10.1016/S0079-6611(01)00083-0)
- 825 62. Schott, F. A., Xie, S.-P., & McCreary, J. P. (2009). Indian Ocean circulation and  
826 climate variability. *Reviews of Geophysics*, 47(1).  
827 <https://doi.org/10.1029/2007RG000245>
- 828 63. Shankar, D., Vinayachandran, P. N., & Unnikrishnan, A. S. (2002). The monsoon  
829 currents in the north Indian Ocean. *Progress in Oceanography*, 52(1), 63–120. [https://](https://doi.org/10.1016/S0079-6611(02)00024-1)  
830 [doi.org/10.1016/S0079-6611\(02\)00024-1](https://doi.org/10.1016/S0079-6611(02)00024-1)
- 831 64. Shetye, S. R., & Gouveia, A. D. (1998). *Coastal circulation in the North Indian*  
832 *Ocean: Coastal segment (14,S-W)*. John Wiley and Sons, New York, USA.  
833 <http://drs.nio.org/drs/handle/2264/1966>
- 834 65. Sivadas, S. K., & Ingole, B. S. (2016). Biodiversity and biogeography pattern of  
835 benthic communities in the coastal basins of India. *Marine Biology Research*, 12(8),  
836 797–816. <https://doi.org/10.1080/17451000.2016.1203949>
- 837 66. Spalding, M. D., Fox, H. E., Allen, G. R., Davidson, N., Ferdaña, Z., Finlayson, M.,  
838 Halpern, B. S., Jorge, M. A., Lombana, A. L., Lourie, S. A., Martin, K. D., McManus,  
839 E., Molnar, J., Recchia, C. A., & Robertson, J. (2007). Marine ecoregions of the  
840 world: A bioregionalization of coastal and shelf areas. *Bioscience*, 57(7), 573–583.  
841 <https://doi.org/10.1641/B570707>
- 842 67. Varkey, M. J., Murty, V. S. N., & Suryanarayana, A. (1996). Physical oceanography  
843 of the Bay of Bengal and Andaman Sea. *Oceanography and Marine Biology - an*  
844 *Annual Review*, 34, 1–70.

- 845 68. Vinayachandran, P. N., & Yamagata, T. (1998). Monsoon response of the sea around  
846 Sri Lanka: Generation of thermal domes and anticyclonic vortices. *Journal of*  
847 *Physical Oceanography*, 28(10), 1946–1960. [https://doi.org/10.1175/1520-](https://doi.org/10.1175/1520-0485(1998)028<1946:MRO TSA>2.0.CO;2)  
848 [0485\(1998\)028<1946:MRO TSA>2.0.CO;2](https://doi.org/10.1175/1520-0485(1998)028<1946:MRO TSA>2.0.CO;2)
- 849 69. Vinayachandran, P. N., Chauhan, P., Mohan, M., & Nayak, S. (2004). Biological  
850 response of the sea around Sri Lanka to summer monsoon. *Geophysical Research*  
851 *Letters*, 31(1). <https://doi.org/10.1029/2003GL018533>
- 852 70. Vinayachandran, P. N. (2009). Impact of physical processes on chlorophyll  
853 distribution in the Bay of Bengal. In *Indian Ocean Biogeochemical Processes and*  
854 *Ecological Variability* (pp. 71–86). American Geophysical Union (AGU).  
855 <https://doi.org/10.1029/2008GM000705>
- 856 71. Vinayachandran, P. N., Francis, P. A., & Rao, S. A. (2009). Indian Ocean dipole:  
857 processes and impacts, In (N. Mukunda Ed.) *Current trends in science* (pp. 569-589).  
858 Platinum Jubilee Special, Ed., Indian Academy of Sciences (IASc), Bangalore.
- 859 72. Vinayachandran, P. N., Matthews, A. J., Kumar, K. V., Sanchez-Franks, A.,  
860 Thushara, V., George, J., Vijith, V., Webber, B. G. M., Queste, B. Y., Roy, R.,  
861 Sarkar, A., Baranowski, D. B., Bhat, G. S., Klingaman, N. P., Peatman, S. C., Parida,  
862 C., Heywood, K. J., Hall, R., King, B., ... Joshi, M. (2018). BoBBLE: Ocean–  
863 Atmosphere interaction and its impact on the South Asian Monsoon. *Bulletin of the*  
864 *American Meteorological Society*, 99(8), 1569–1587. [https://doi.org/10.1175/BAMS-](https://doi.org/10.1175/BAMS-D-16-0230.1)  
865 [D-16-0230.1](https://doi.org/10.1175/BAMS-D-16-0230.1)
- 866 73. Vinayachandran, P. N. M., Masumoto, Y., Roberts, M., Hugget, J., Halo, I.,  
867 Chatterjee, A., Amol, P., Gupta, G. V. M., Singh, A., Mukherjee, A., Prakash, S.,  
868 Beckley, L. E., Raes, E. J., & Hood, R. (2021). Reviews and syntheses: Physical and

869 biogeochemical processes associated with upwelling in the Indian Ocean.

870 *Biogeosciences Discussions*, 1–128. <https://doi.org/10.5194/bg-2020-486>

871 **Acknowledgements**

872

873 This work was supported by the Department of Biotechnology, Government of India  
874 (BT/PR15704/AAQ/3/758/2015). Collaborative work was facilitated by an EMBO Short-  
875 Term Fellowship (STF 7321) awarded to DKB to visit Observatoire Océanologique de  
876 Banyuls Sur Mer (UPMC/CNRS), France. Research fellowship to DKB was awarded by the  
877 Council of Scientific and Industrial Research, Government of India (09/079(2450)/2011-  
878 EMR-I). DKB is grateful to Aarti Krishnamoorthy, Aditya Dharapuram and Lakshmi Prasad  
879 Natarajan for offering technical support for running the particle tracking simulations.

880

881 **Data availability statement**

882

883 The HYCOM output of gridded horizontal velocities is open-source and available for  
884 download from <https://www.hycom.org/dataserver/gofs-3pt0/reanalysis>. R and MATLAB  
885 scripts used for analyzing simulated particle trajectories will be made available at  
886 [https://github.com/bhartidk/larval\\_dispersal](https://github.com/bhartidk/larval_dispersal).
